# Supplementary material for: Disability and Participation in Breast and Cervical Cancer Screening: A Systematic Review and Meta-Analysis
Source: MDPI journal article supplement (doi:10.3390/ijerph19159465), 2022-08-02
Supplement: s1 [file s1]

| No. | MEDLINE search terms                                                                                                                           |
|-----|------------------------------------------------------------------------------------------------------------------------------------------------|
|     | 1. Disabled persons/or amputees/or hearing impaired persons/or mentally ill persons/ or visually impaired persons/or mentally disabled persons |
|     | 2. (disabled person\$ or disab\$ or disabled people).mp                                                                                        |
|     | 3. amputee\$.mp                                                                                                                                |
|     | 4. (hearing impaired person\$ or hearing impaired people).mp                                                                                   |
|     | 5. (mentally disabled person\$ or mentally disabled people).mp                                                                                 |
|     | 6. (mentally ill person\$ or mentally ill people).mp                                                                                           |
|     | 7. (visually impaired person\$ or visually impaired people).mp                                                                                 |
|     | 8. Developmental Disabilities/ or developmental disability\$.mp                                                                                |
|     | 9. Mental Retardation/ or mental\$ retard\$.mp                                                                                                 |
|     | 10. Mobility Limitation/ or mobility limitation\$.mp                                                                                           |
|     | 11. Dependent ambulation/ or dependent ambulation.mp                                                                                           |
|     | 12. Paraplegia/ or paraplegia.mp                                                                                                               |
|     | 13. Quadriplegia/ or quadriplegia.mp                                                                                                           |
|     | 14. Hearing Loss/ or hearing loss.mp                                                                                                           |
|     | 15. Blindness/ or blindness.mp                                                                                                                 |
|     | 16. Vision Disorders/ or vision disorder\$.mp                                                                                                  |
|     | 17. exp Self-Help Devices/ or assistive technology.mp                                                                                          |
|     | 18. Mental Disorders/ or mental disorder\$.mp                                                                                                  |
|     | 19. psychiatric disabilit\$.mp                                                                                                                 |
|     | 20. (mental health disabilit\$ or mental health impairment\$).mp                                                                               |
|     | 21. functional limitation\$.mp                                                                                                                 |
|     | 22. activity limitation\$.mp                                                                                                                   |
|     | 23. mobility impairment\$.mp                                                                                                                   |
|     | 24. vision impairment\$.mp                                                                                                                     |
|     | 25. hearing impairment\$.mp                                                                                                                    |
|     | 26. cognitive impairment\$.mp                                                                                                                  |
|     | 27. intellectual disabilit\$.mp                                                                                                                |
|     | 28. participation limitation\$.mp                                                                                                              |

|                                                                                                                                                           |
|-----------------------------------------------------------------------------------------------------------------------------------------------------------|
| 29. 1 or 2 or 3 or 4 or 5 or 6 or 7 or 8 or 9 or 10 or 11 or 12 or 13 or 14 or 15 or 16 or 17 or 18 or 19 or 20 or 21 or 22 or 23 or 24 or 25 or 26 or 28 |
| 30. Mass Screening/                                                                                                                                       |
| 31. Screening.mp.                                                                                                                                         |
| 32. Early detection.mp.                                                                                                                                   |
| 33. Screening programmes.mp                                                                                                                               |
| 34. screening program*.mp.]                                                                                                                               |
| 35. detection.mp.                                                                                                                                         |
| 36. programme\$.mp.                                                                                                                                       |
| 37. cancer screening.mp.                                                                                                                                  |
| 38. neoplasm screening.mp.                                                                                                                                |
| 39. cancer detection.mp.                                                                                                                                  |
| 40. screening\$.mp.                                                                                                                                       |
| 41. screen*.mp.                                                                                                                                           |
| 42. mammography.mp                                                                                                                                        |
| 43. Mammography/                                                                                                                                          |
| 44. Papanicolaou Test/                                                                                                                                    |
| 45. HPV screening.mp.                                                                                                                                     |
| 46. mammograph*.mp.                                                                                                                                       |
| 47. 30 or 31 or 32 or 33 or 34 or 35 or 36 or 37 or 38 or 39 or 40 or 41 or 42 or 43 or 44 or 45 or 46                                                    |
| 48. Breast Neoplasms/                                                                                                                                     |
| 49. Uterine Cervical Neoplasms/                                                                                                                           |
| 50. 48 or 49                                                                                                                                              |
| 51. 29 and 47 and 50                                                                                                                                      |
